# Supplementary material for: Removal of Flotation Collector O-Isopropyl-N-ethylthionocarbamate from Wastewater
Source: Molecules. 2021 Nov 4;26(21):6676. doi: 10.3390/molecules26216676 (PMC8588165; doi:10.3390/molecules26216676)
Supplement: Supplementary file 1 [file molecules-26-06676-s001.zip › molecules-1402452-supplementary.pdf]

Supplementary S1

MASS SPECTRA OF COMPOUNDS 1-5

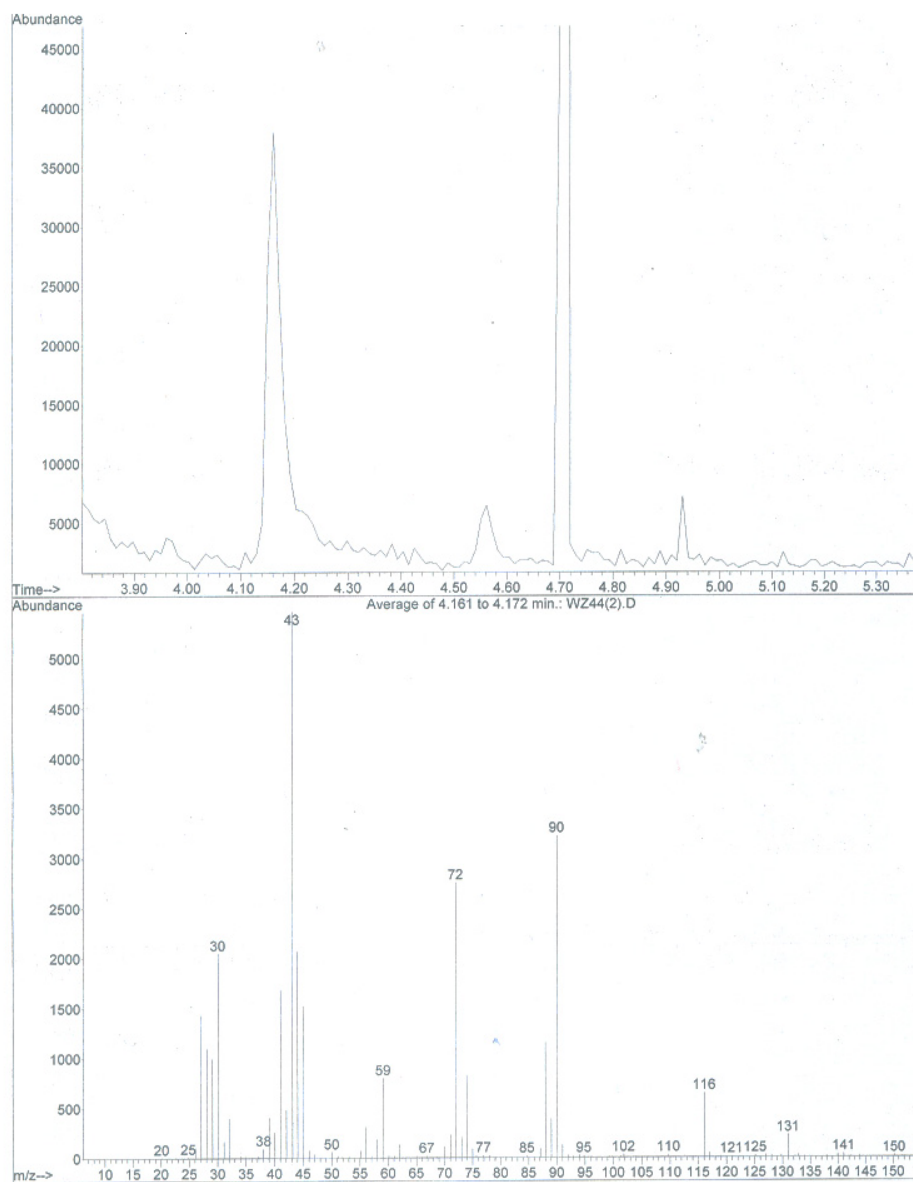

The GC-MS spectrometry of compound 1 (O-Isopropyl N-ethylcarbamate)

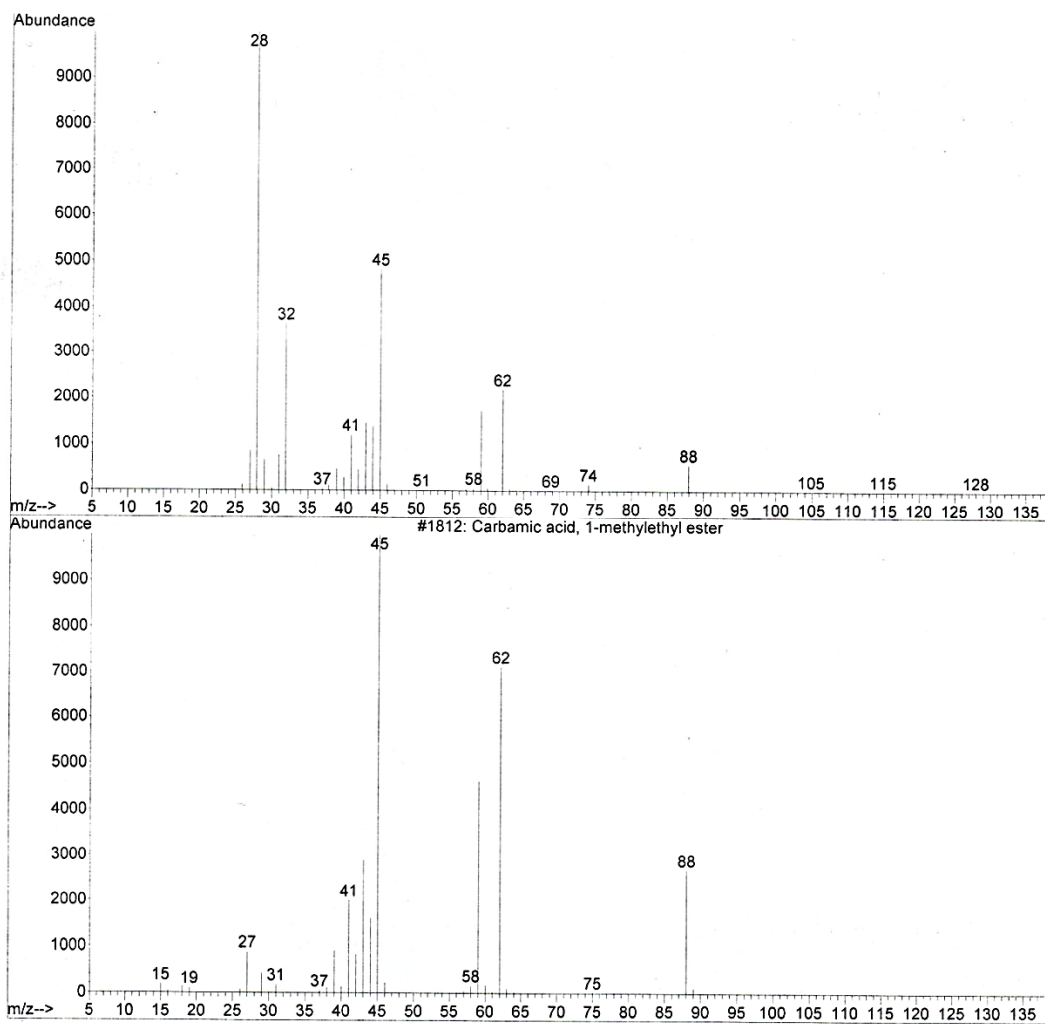

The GC-MS spectrometry of compound 2 (O-isopropyl thionocarbamate)

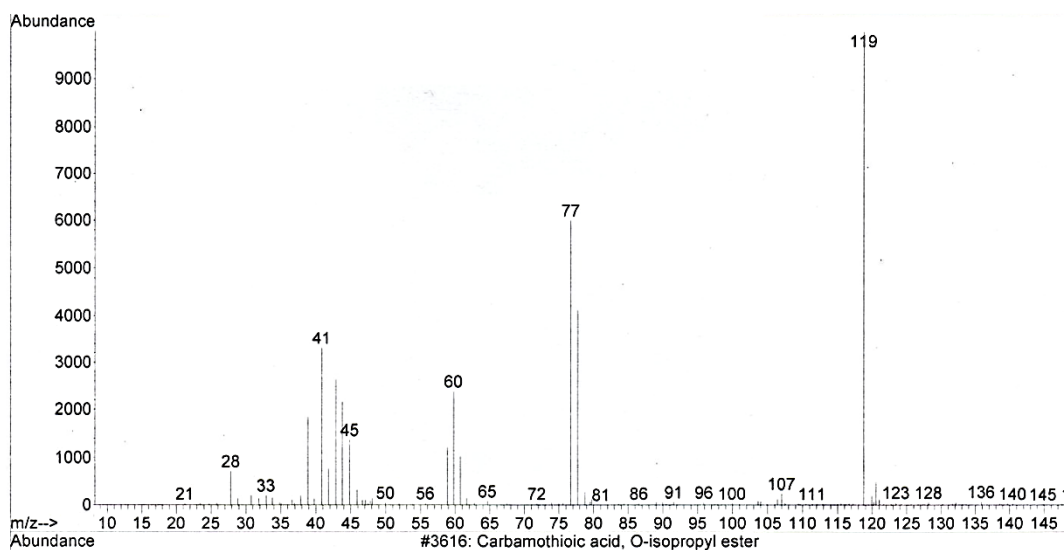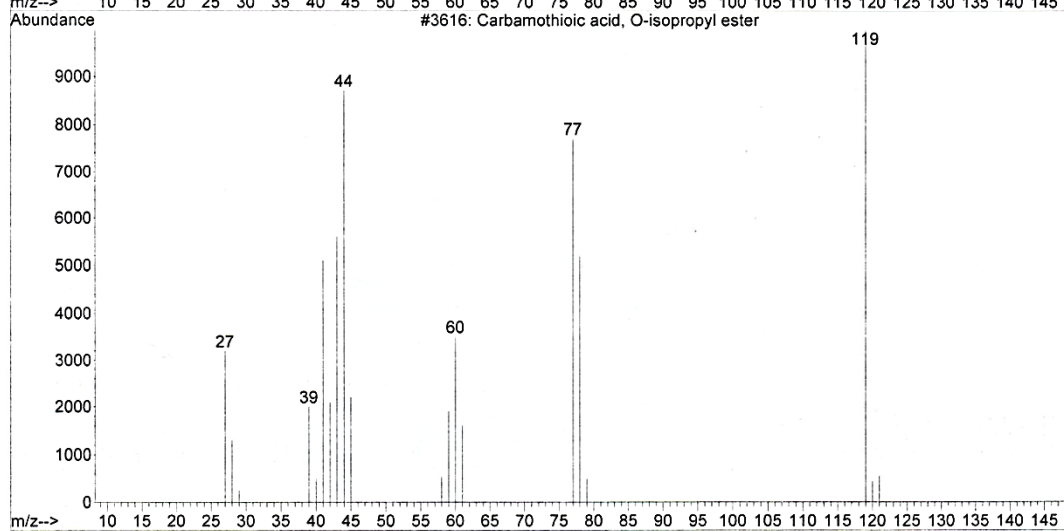

The GC-MS spectrometry of compound 3 (O-isopropyl carbamate)

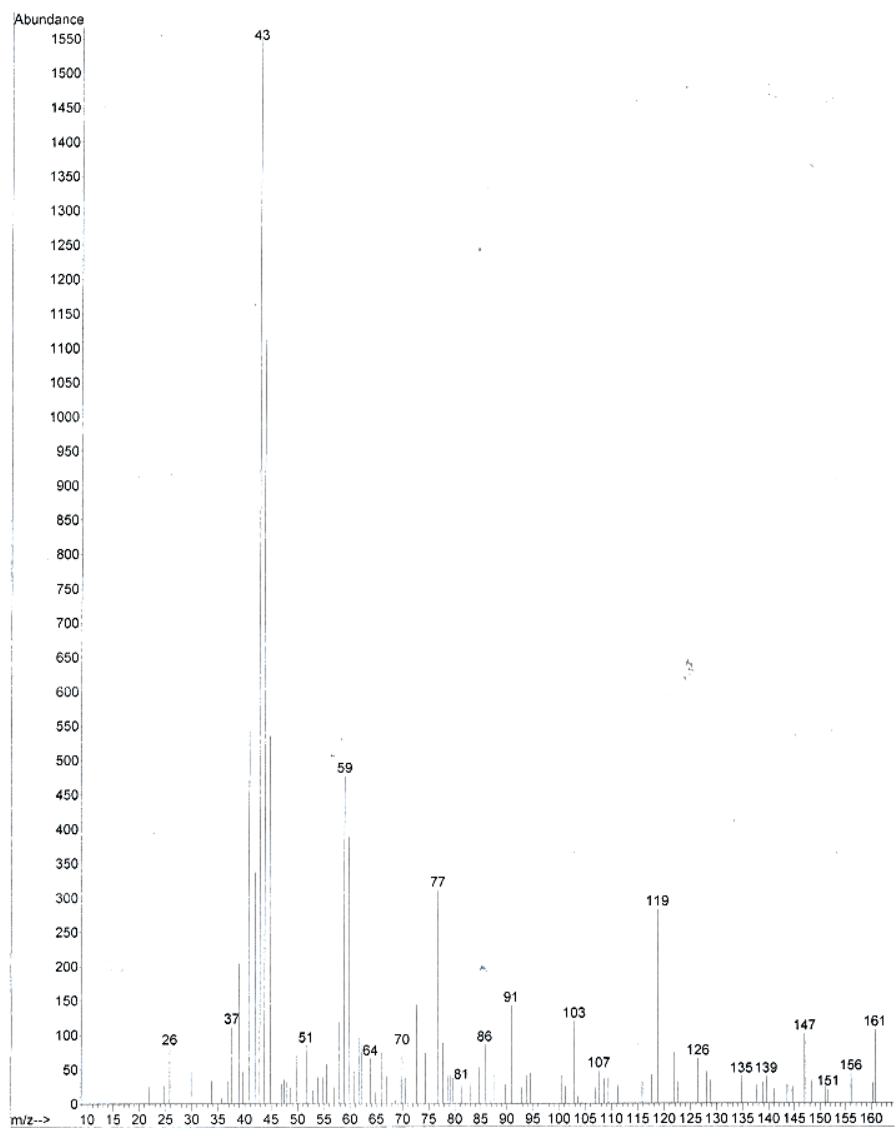

The GC-MS spectrometry of compound 4 (O-isopropyl N-acetylthionocarbamate)

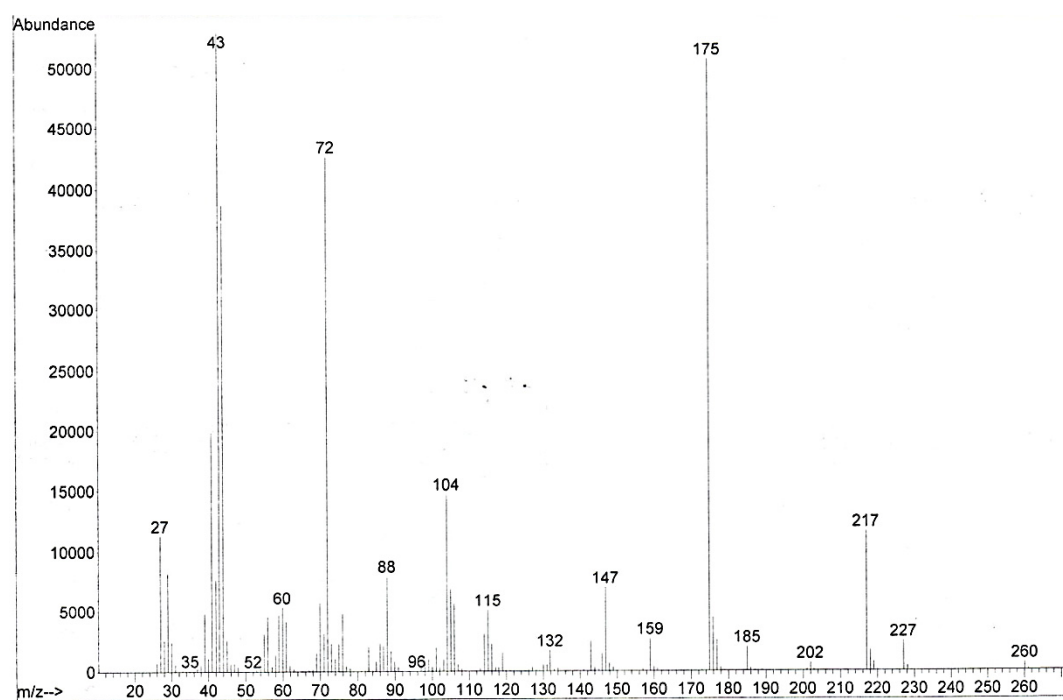

**The HPLC-MS spectrometry of compound 5 (isopropyl N-((ethylimino)(isopropoxy)methyl)-N-ethylthionocarbamate)**

Supplementary S2

NMR SPECTRA OF SYNTHESIZED COMPOUNDS 1 AND 5

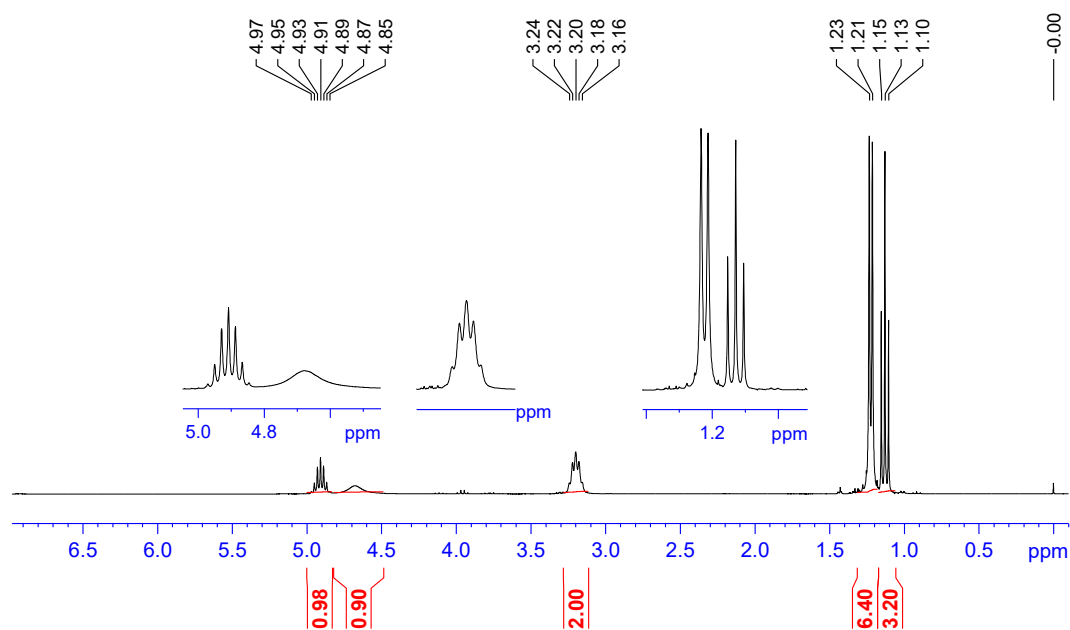

The<sup>1</sup>H NMR spectrometry of compound 1 (O-Isopropyl N-ethylcarbamate)

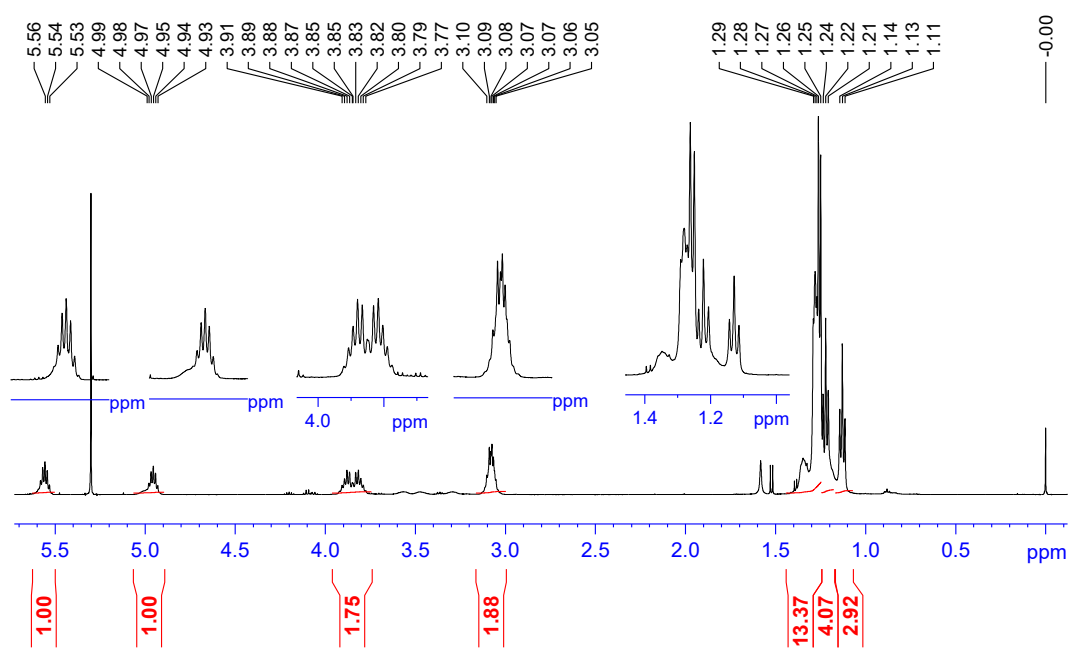

The<sup>1</sup>H NMR spectrometry of compound 5 (isopropyl N-((ethylimino)(isopropoxy)methyl)-N-ethylthionocarbamate)

### Supplementary S3

### CHROMATOGRAMS OF DEGRADATION EXPERIMENTS

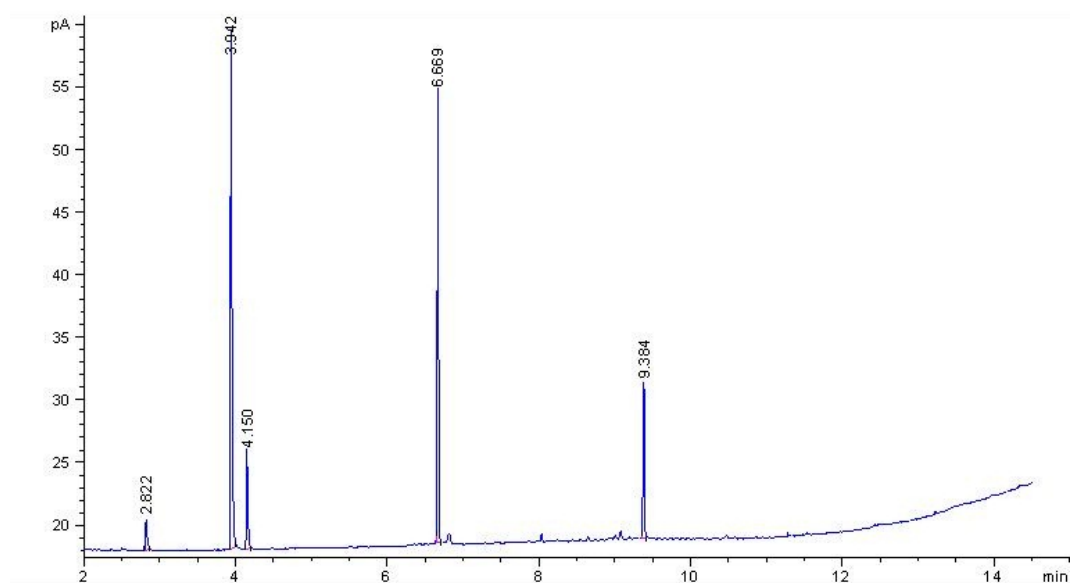

**GC chromatogram after reaction with sodium hypochlorite (1 time higher than IPETC molar concentration) for 2 hours**

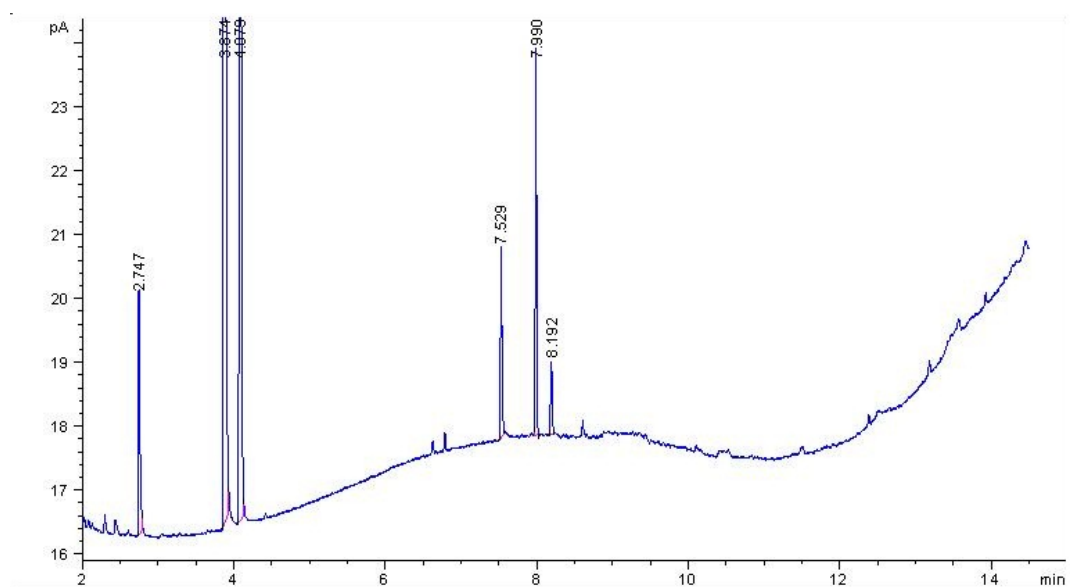

**GC chromatogram after reaction with sodium hypochlorite (5 times higher than IPETC molar concentration) for 2 hours**

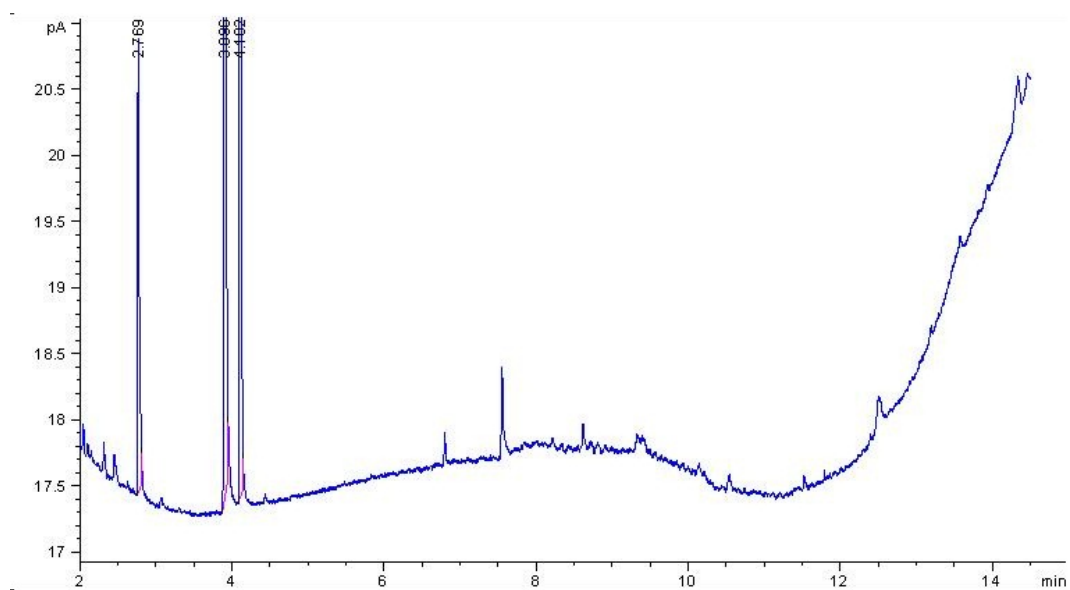

**GC chromatogram after reaction with sodium hypochlorite (10 times higher than IPETC molar concentration) for 2 hours**

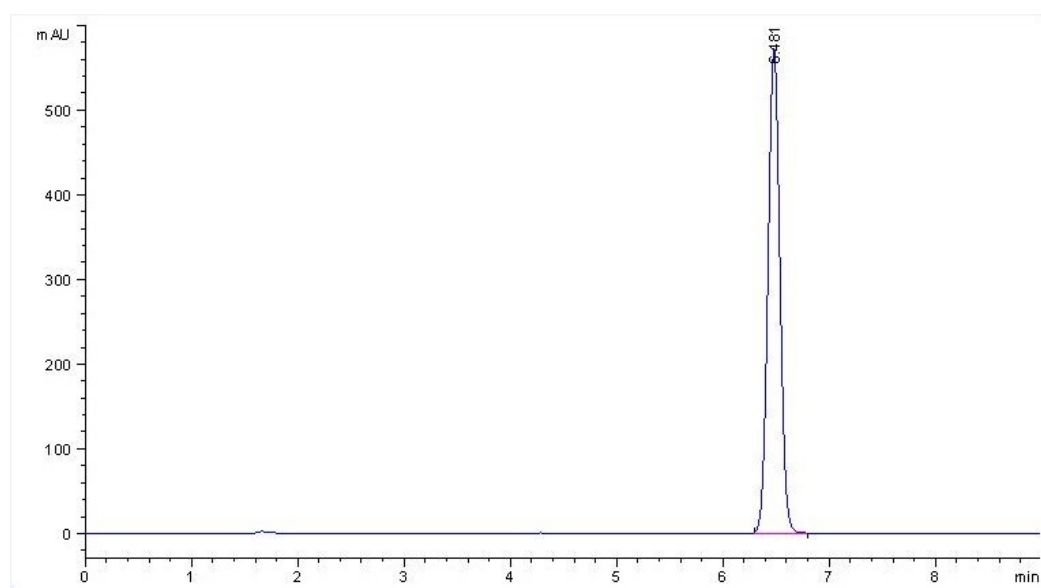

**IPETC solution added with iron salt before irradiation (continuous oxygenation)**

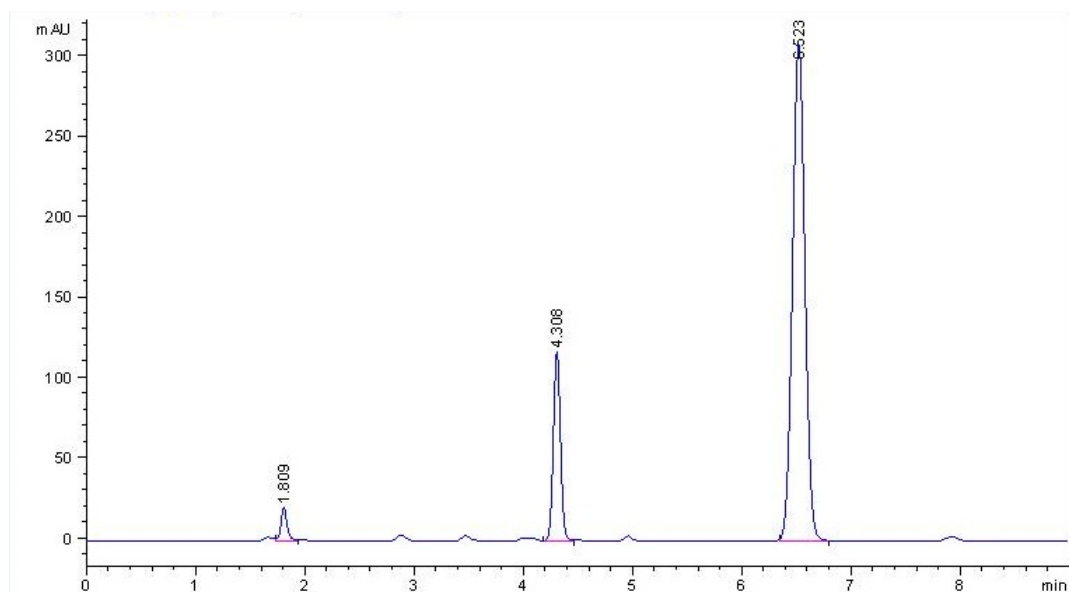

**IPETC solution added with iron salt after 2 hours irradiation (continuous oxygenation)**

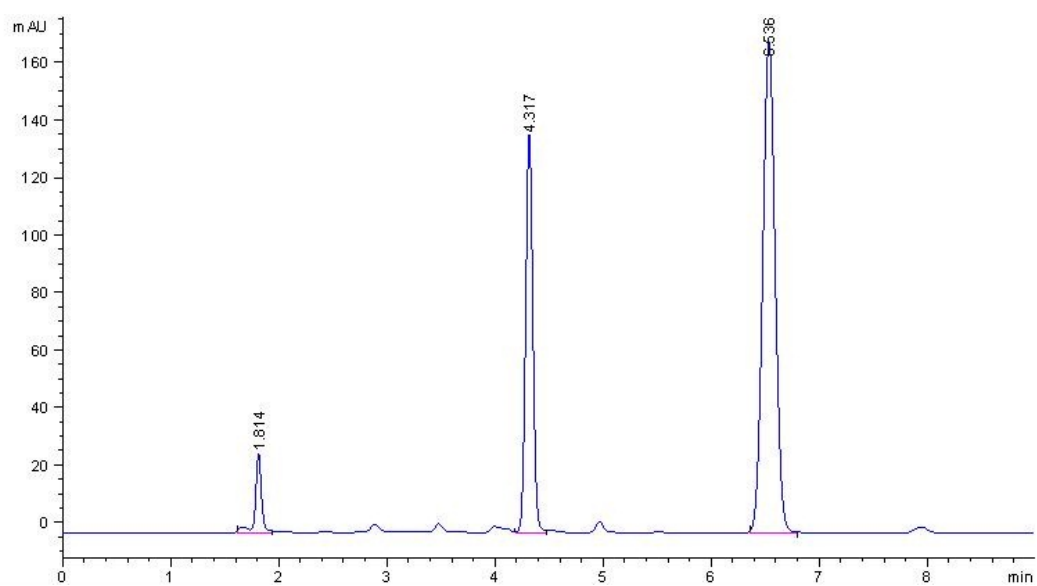

**IPETC solution added with iron salt after 4 hours irradiation (continuous oxygenation)**

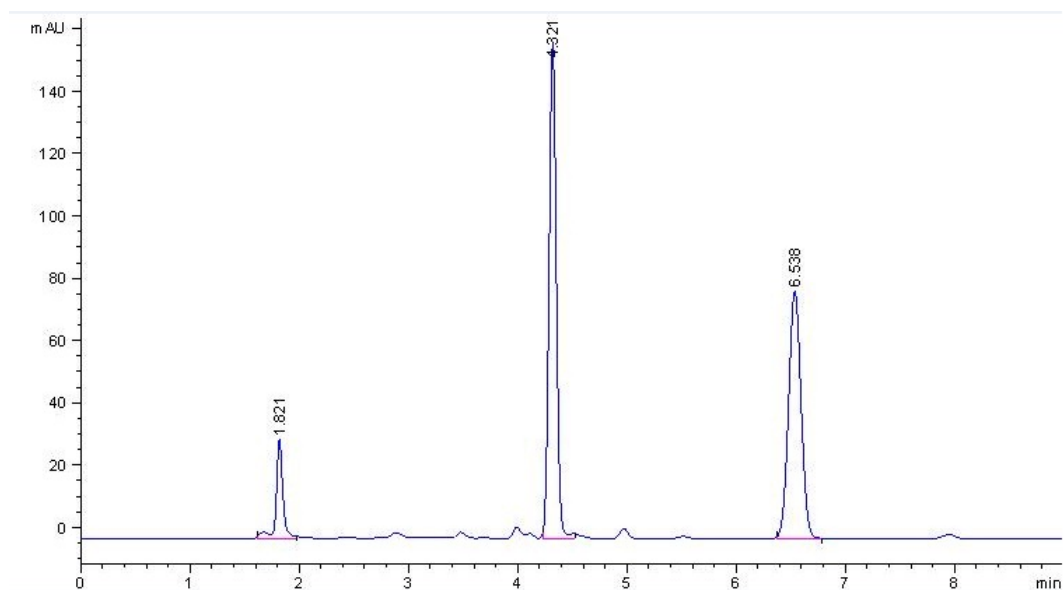

**IPETC solution added with iron salt after 6 hours irradiation (continuous oxygenation)**

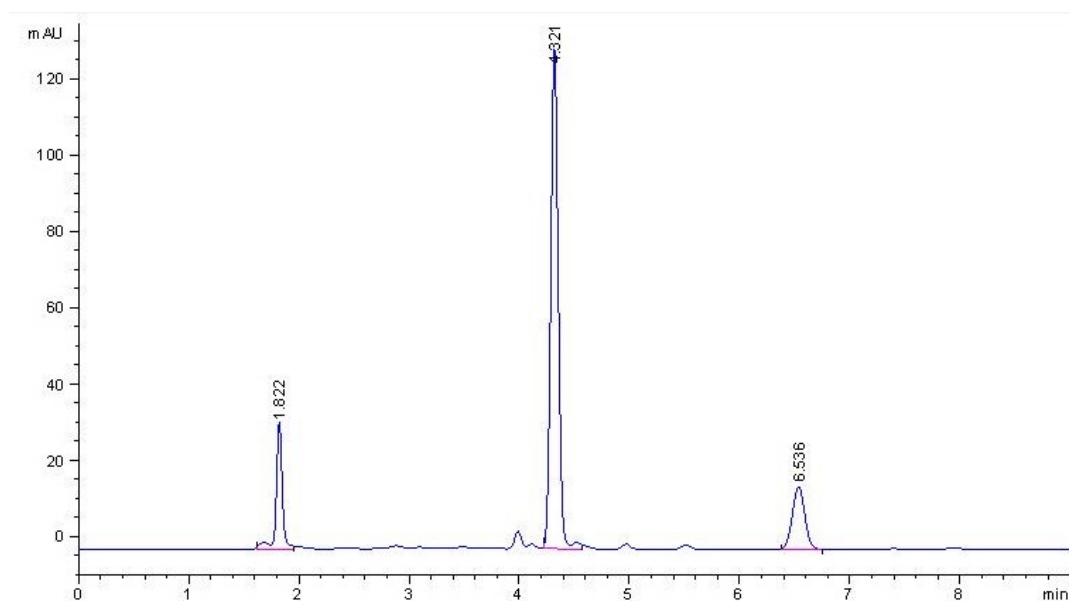

**IPETC solution added with iron salt after 8 hours irradiation (continuous oxygenation)**

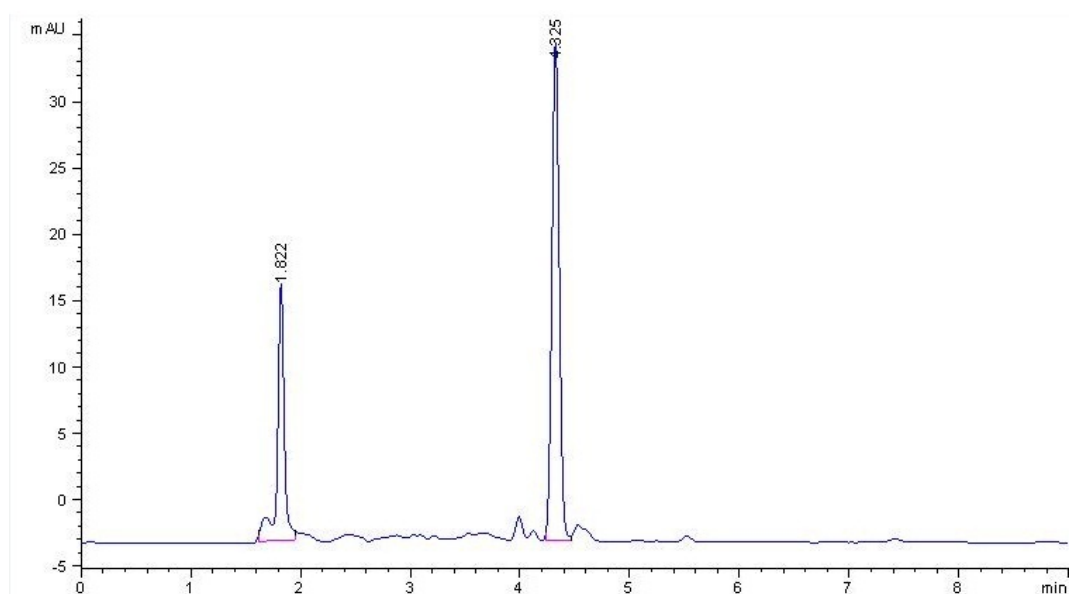

**IPETC solution added with iron salt after 10 hours irradiation (continuous oxygenation)**

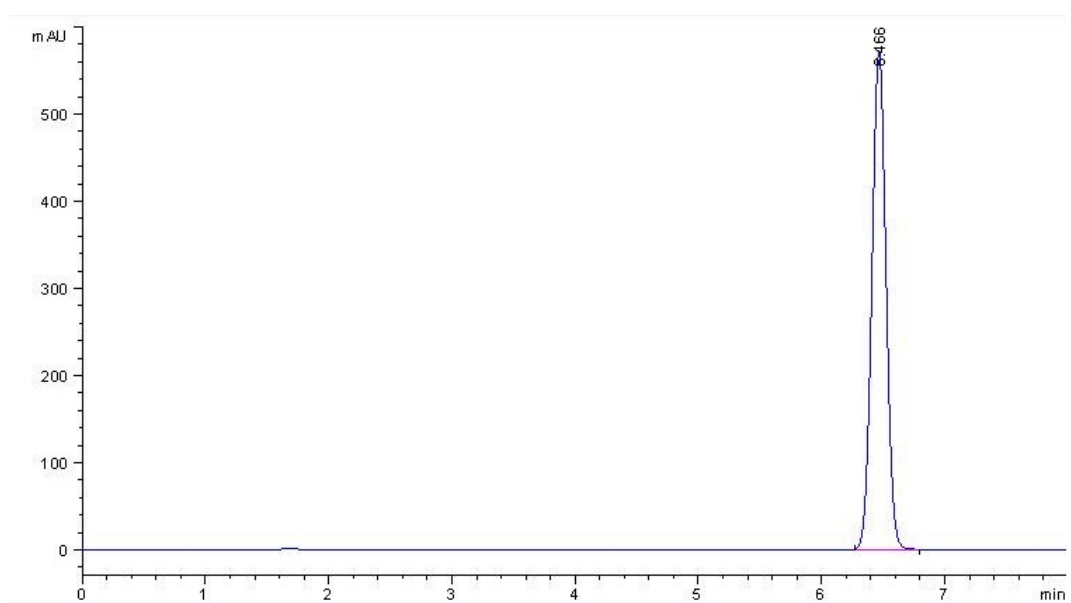

**IPETC solution added with iron salt before irradiation (continuous air)**

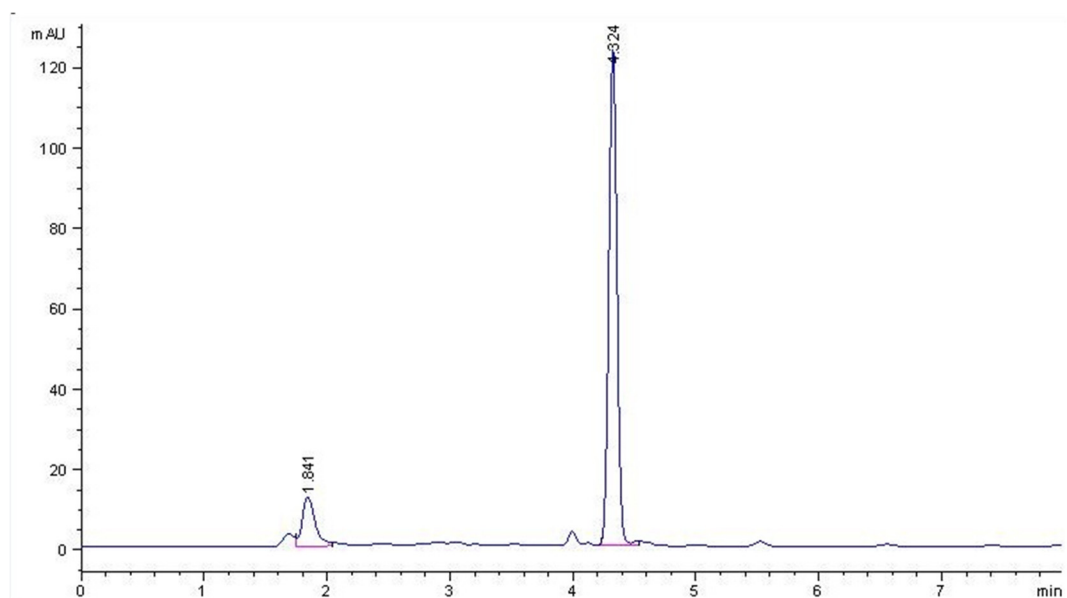

**IPETC solution added with iron salt after 10 hours irradiation (continuous air)**

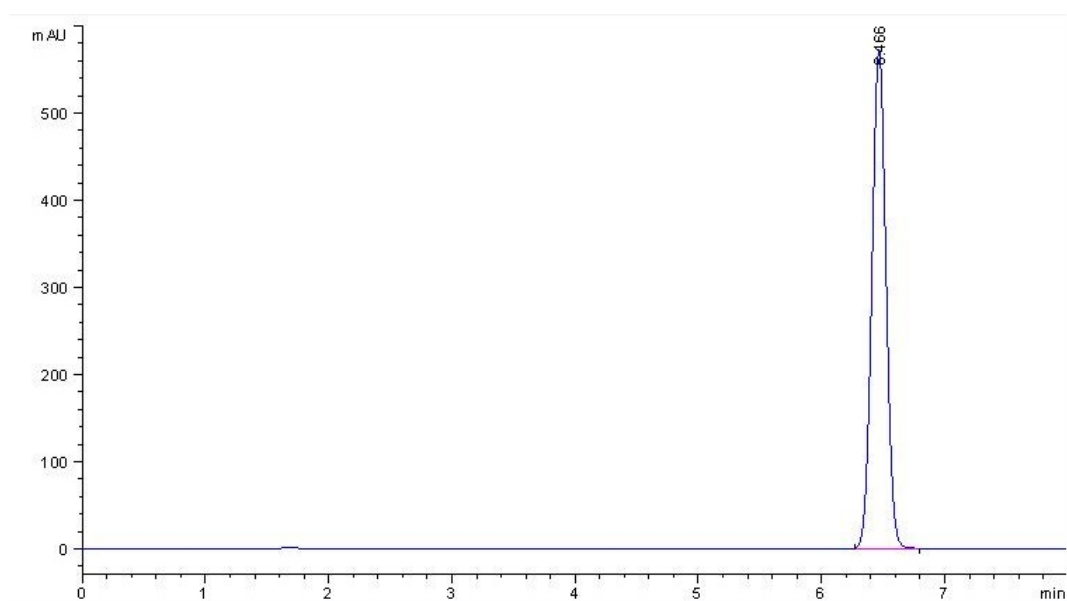

**IPETC solution added with iron salt before irradiation (air, not continuous)**

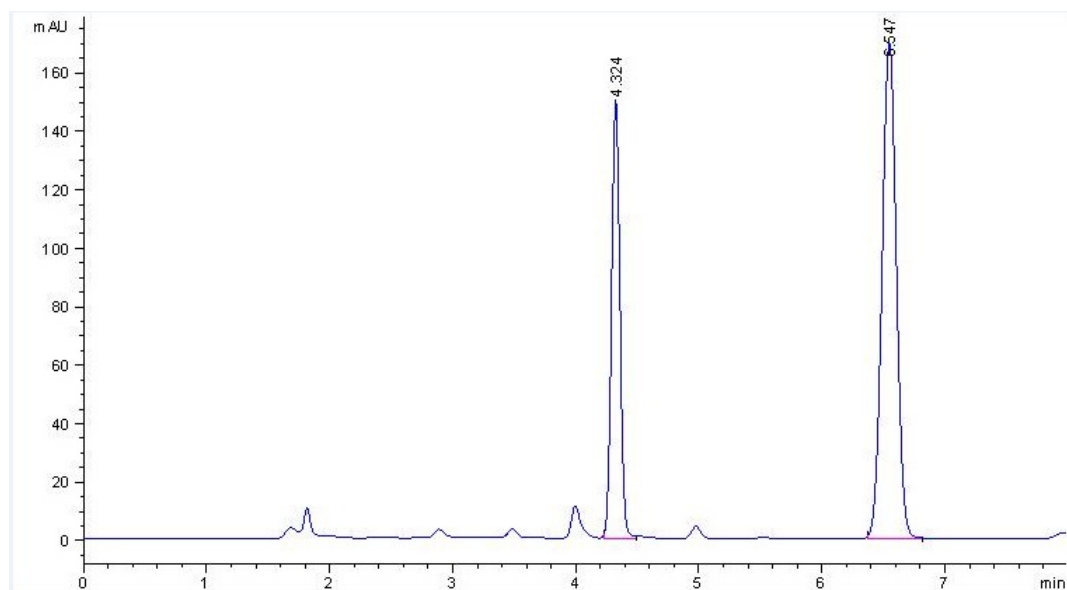

**IPETC solution added with iron salt after 10 hours irradiation (air, not continuous)**

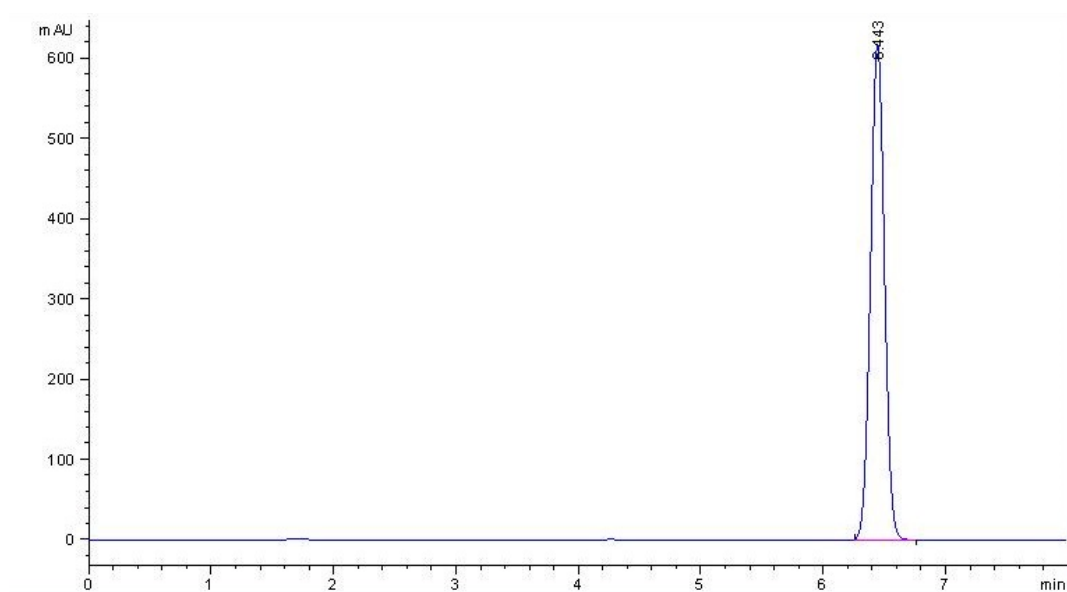

**IPETC solution added with iron salt before irradiation (saturated with argon)**

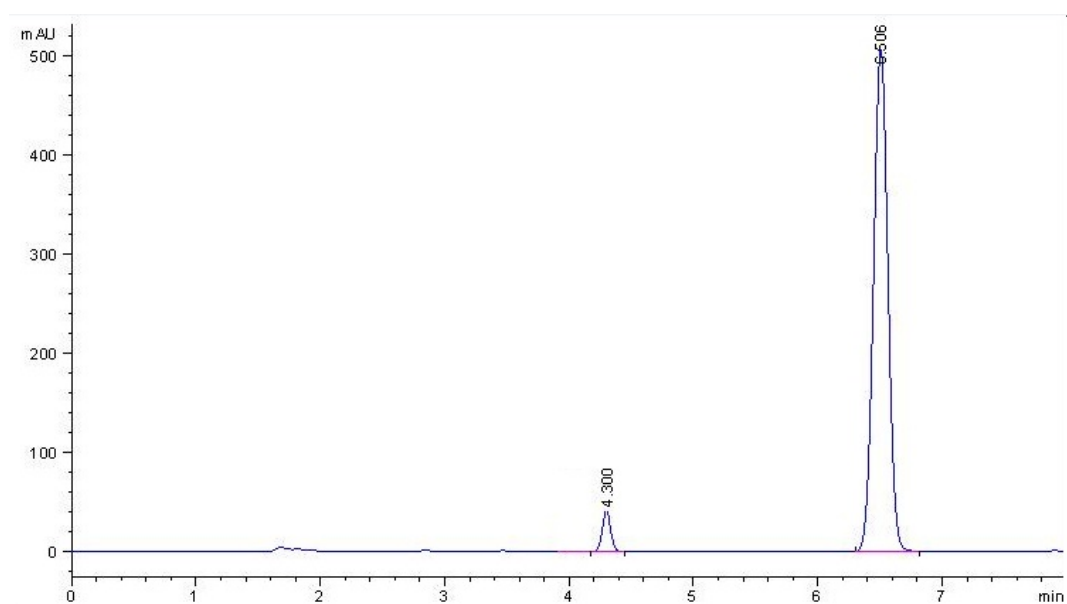

**IPETC solution added with iron salt after 10 hours irradiation (saturated with argon)**

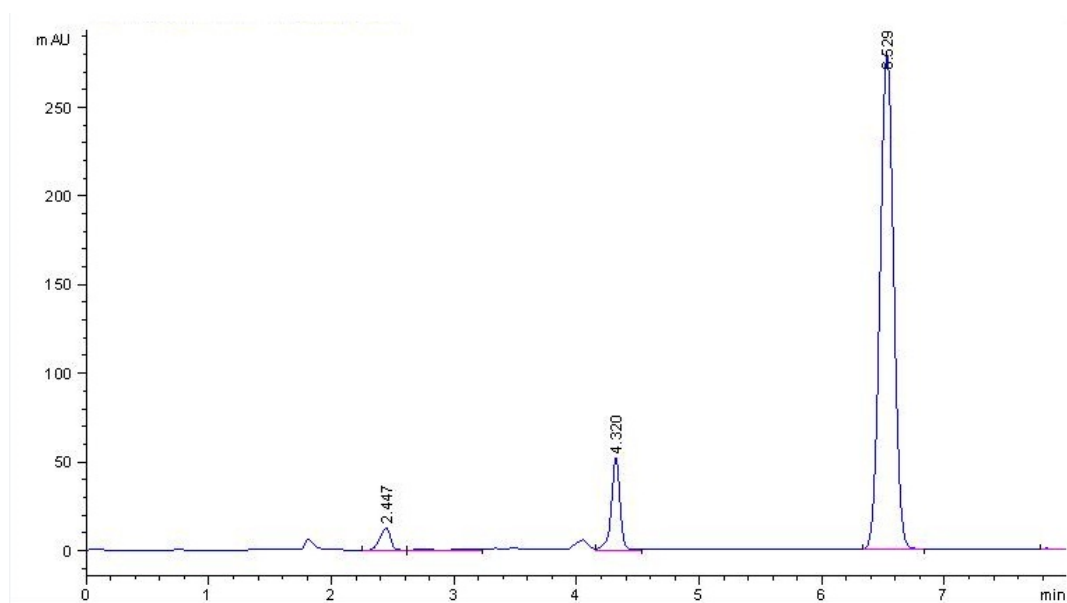

**IPETC solution after 10 hours reaction with 40 mg/L  $\text{Fe}^{2+}$ 、200mg/L  $\text{H}_2\text{O}_2$**

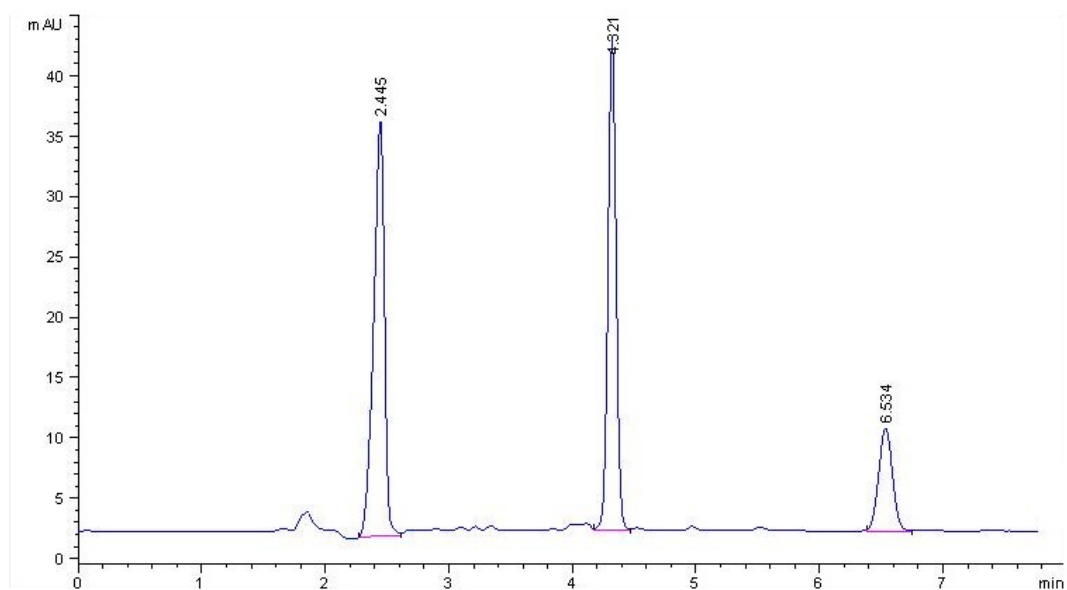

**IPETC solution after 10 hours reaction with 40 mg/L  $\text{Fe}^{2+}$ 、500mg/L  $\text{H}_2\text{O}_2$**

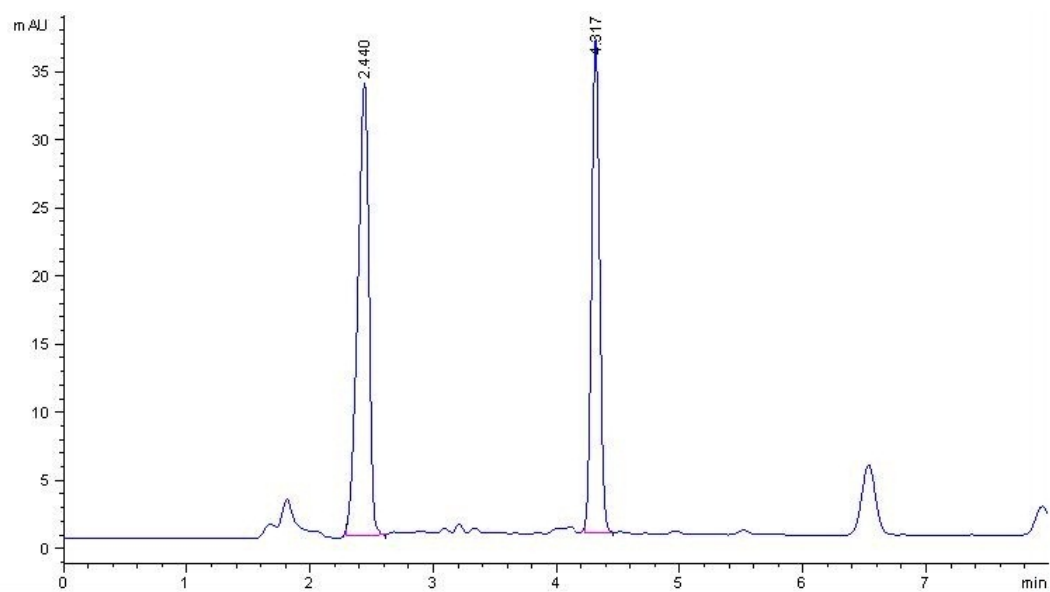

**IPETC solution after 10 hours reaction with 100 mg/L  $\text{Fe}^{2+}$ 、500mg/L  $\text{H}_2\text{O}_2$**
